# Supplementary material for: NMR-Relaxometric Investigation of Mn(II)-Doped Polyoxometalates in Aqueous Solutions
Source: MDPI journal article supplement (doi:10.3390/ijms24087308), 2023-04-15
Supplement: s1 [file s1]

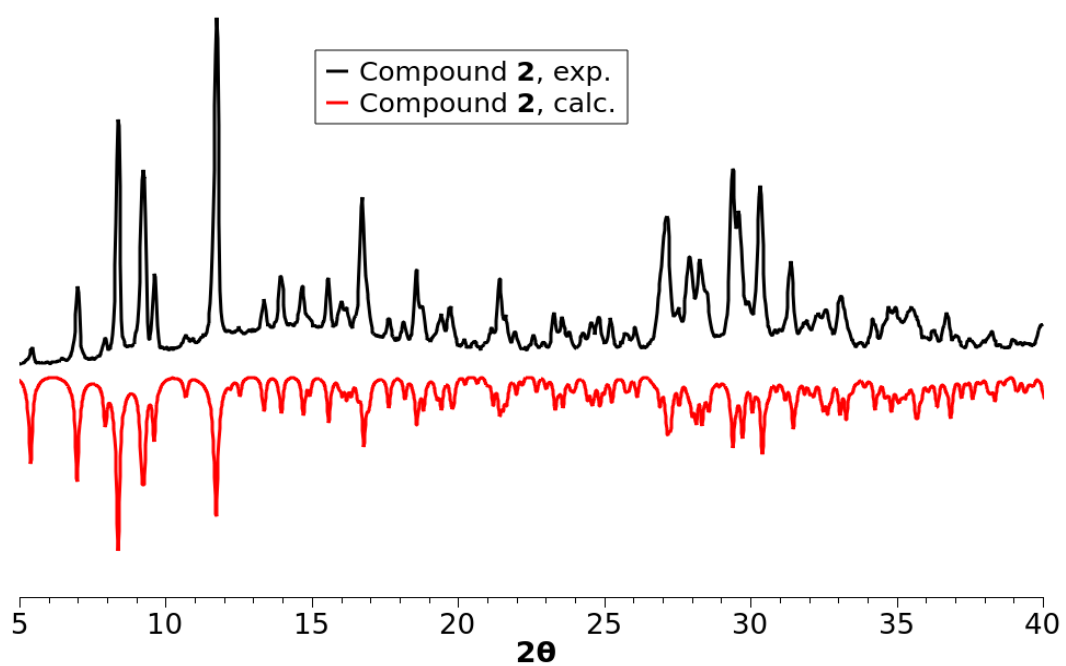

**Figure S1.** X-ray powder diffraction data for **2**.

2.198 eV

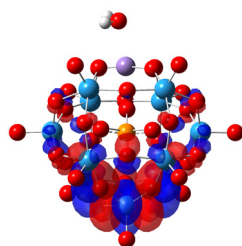

NTO(260 $\beta$ )

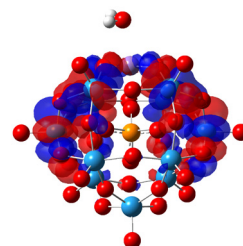

NTO(261 $\beta$ )

2.601 eV

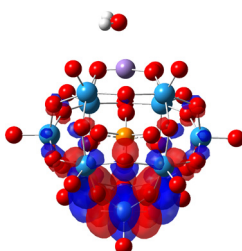

NTO(260 $\beta$ )

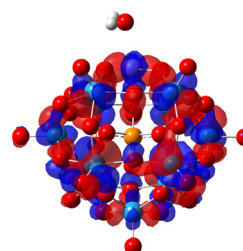

NTO(261 $\beta$ )

3.625 eV

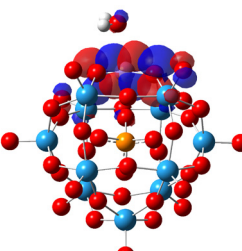

NTO(261 $\alpha$ )  
*from...*

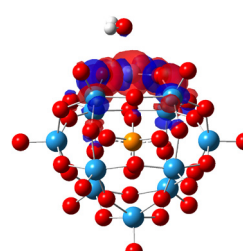

NTO(262 $\alpha$ )  
*to...*

**Figure S2.** NTO analysis for  $[(\text{Mn}^{\text{II}}(\text{H}_2\text{O}))\text{PW}_{11}\text{O}_{39}]^{5-}$ . Color codes: Mn – purple, W – cyan, O – red, P – orange, H – white.

**Table S1.** Atomic ratios W/Mn for  $[(\text{Mn}(\text{H}_2\text{O}))\text{PW}_{11}\text{O}_{39}]^{5-}$  peak calculated from HPLC-ICP-AES-data.

| W/Mn       | Mn 259.3 nm | Mn 260.5 nm | Mn 279.4 nm |
|------------|-------------|-------------|-------------|
| W 209.8 nm | 10.9±0.6    | 11.5±0.6    | 11.1±0.5    |
| W 229.4 nm | 11.3±0.5    | 11.2±0.5    | 11.5±0.6    |
| W 239.7 nm | 10.8±0.4    | 11.0±0.4    | 11.0±0.4    |

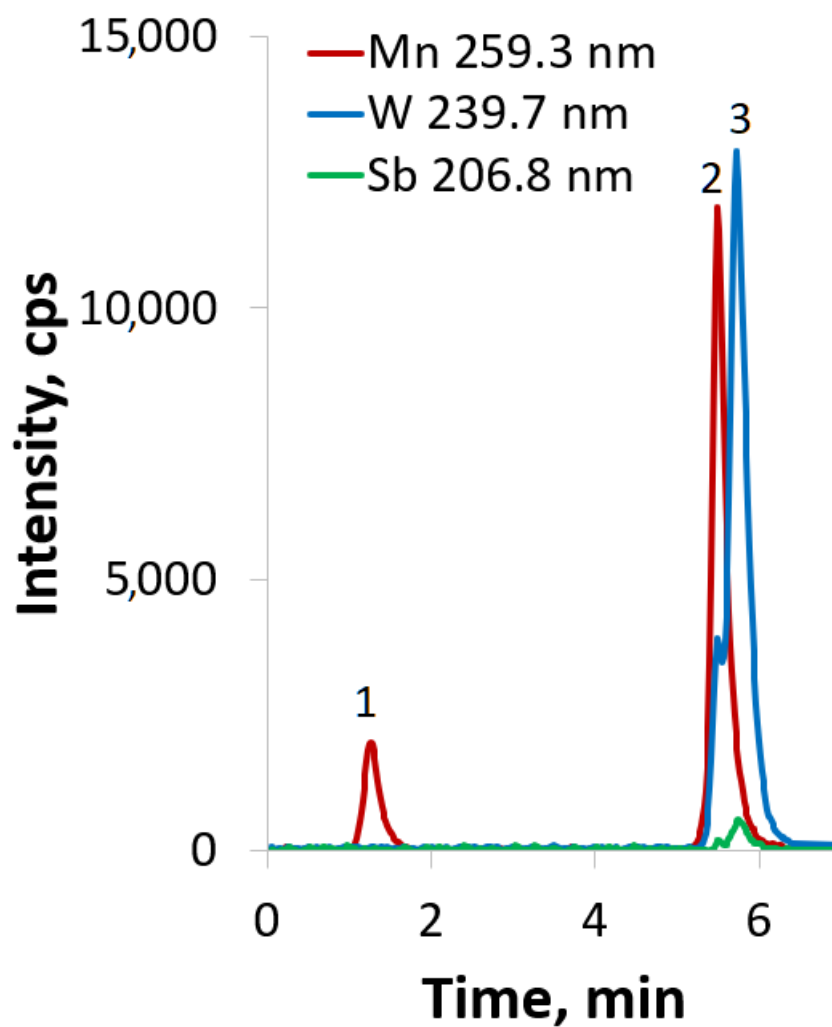

**Figure S3.** HPLC-ICP-AES chromatogram of **2** in water at natural pH scaled from the start of the elution.

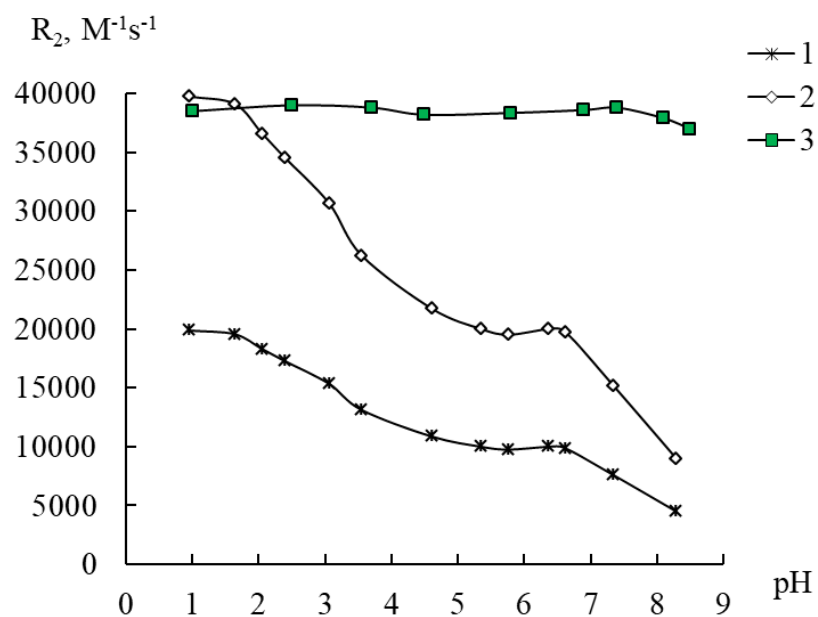

**Figure S4.** Dependence of the spin-spin relaxivity  $R_2$  on pH in a 0.1 M solution of compound **3** in water. Calculations of relaxivity were carried out taking into account manganese(II) concentrations of 0.4 mM (1) and 0.2 mM (2). For comparison, data are presented for a  $\text{MnCl}_2$  solution with a manganese(II) aqua ion content of 0.4 mM (3).

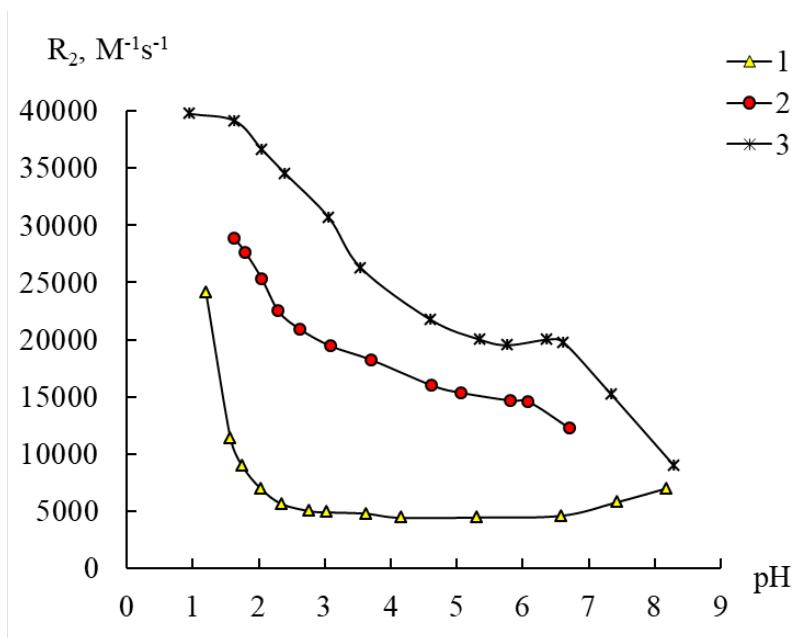

**Figure S5.** Changes in the relaxation efficiency  $R_2$  (a) on the pH of solutions of compounds **1** (0.4 mM) (1), **2** (0.133 mM) (2), and **3** (0.1 mM) (3).  $\text{CMn(II)}$  0.2 (3), 0.4 mM (1, 2).

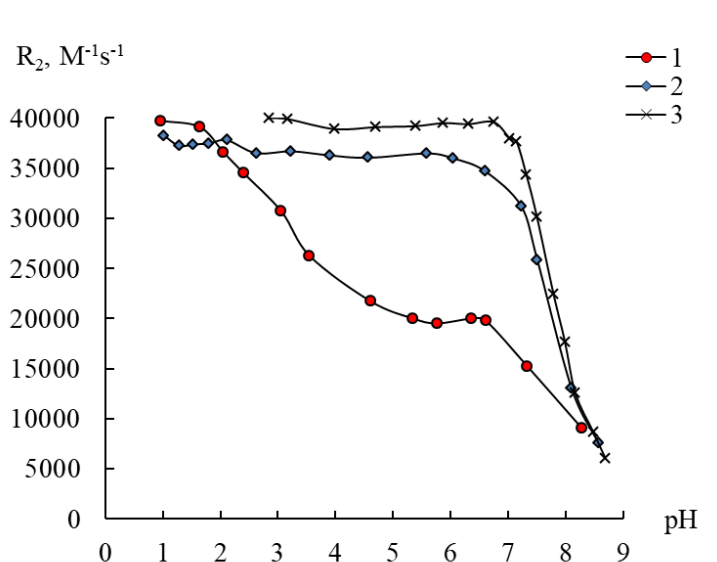

**Figure S6.** Changes in the relaxation efficiency  $R_2$  on pH 0.1 mM solutions of compound **3** in water (1) and in PEI solution (2), and Mn(II) ions in PEI solution (3).  $C_{\text{Mn(II)}}$  0.2 (1, 2), 0.4 mM (3),  $C_{\text{PEI}}$  10 mM (2, 3).

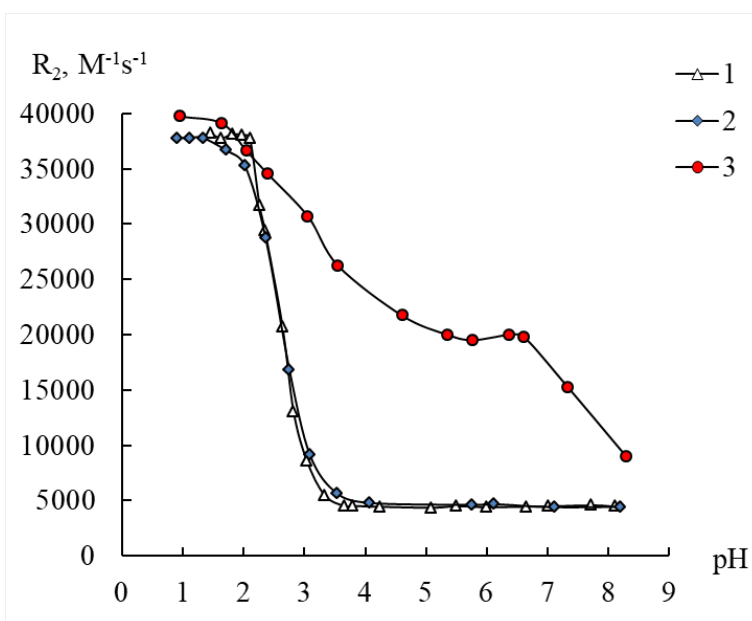

**Figure S7.** Changes in relaxation efficiency  $R_2$  on pH of Mn(II)-EDTA systems (1), compound **1** – EDTA (2), aqueous solution of **1** (3).  $C_{\text{Mn(II)}}$  0.2 (2), 0.4 mM (1, 3),  $C_{\text{EDTA}}$  1 mM (1, 2).

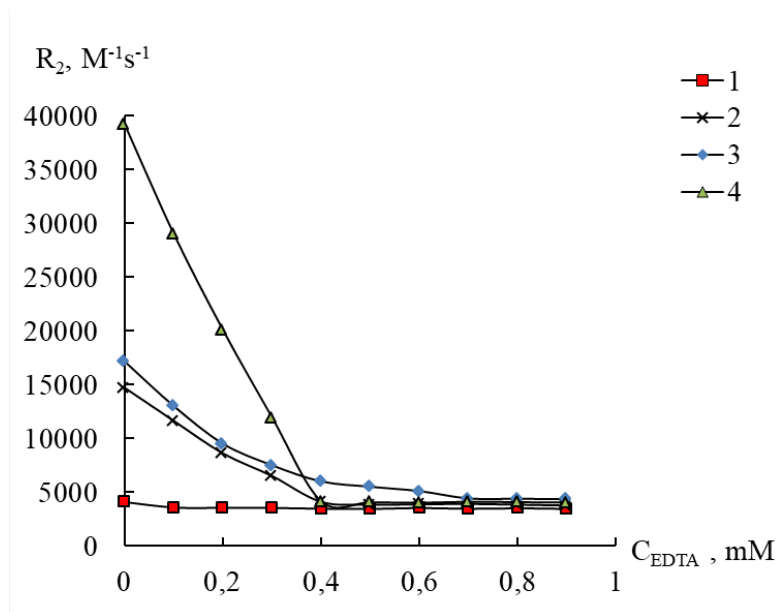

**Figure S8.** Change in the relaxation efficiency  $R_2$  on the content of EDTA in solutions of compounds **1-3** (1-3) and in an aqueous solution of aqua ions Mn(II) (4),  $C_{\text{Mn(II)}}$  0.2 (3), 0.4 mM (1, 2, 4), pH 5.5.

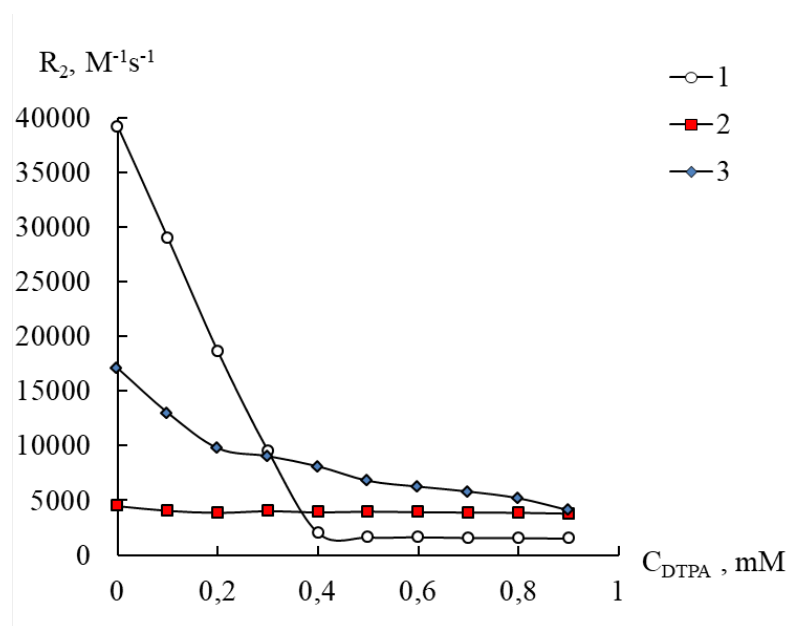

**Figure S9.** Dependence of the relaxation efficiency  $R_2$  on the concentration of DTPA in aqueous solutions of Mn(II) (1) and compounds **1** (2) and **3** (3).  $C_{\text{Mn(II)}}$  0.2 (3), 0.4 mM (1, 2), pH 5.5.

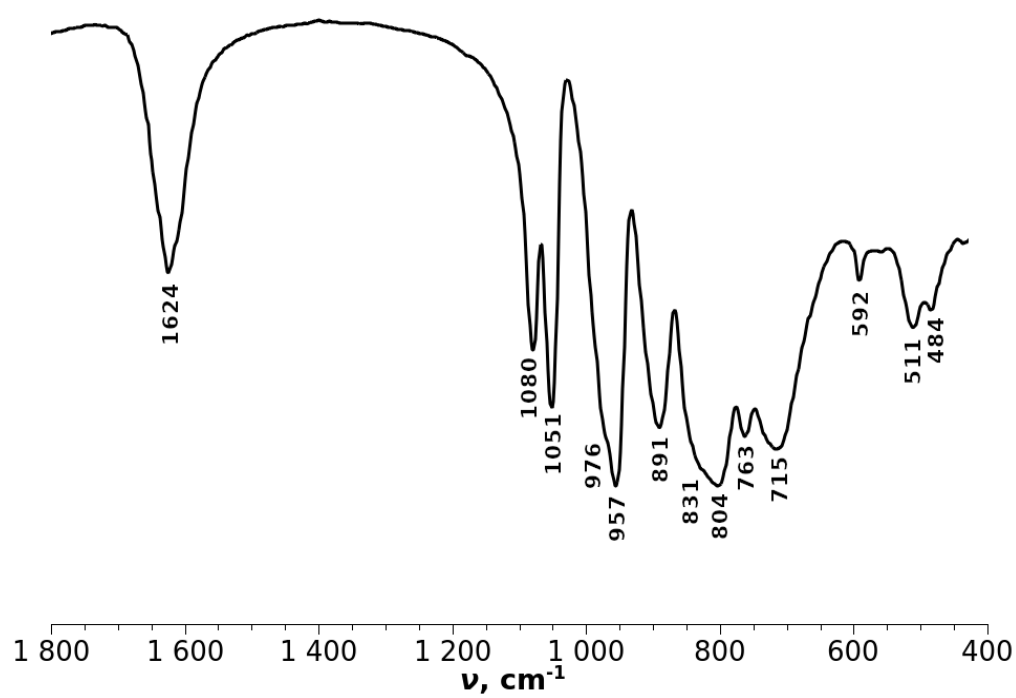

**Figure S10.** IR spectrum of complex 1.

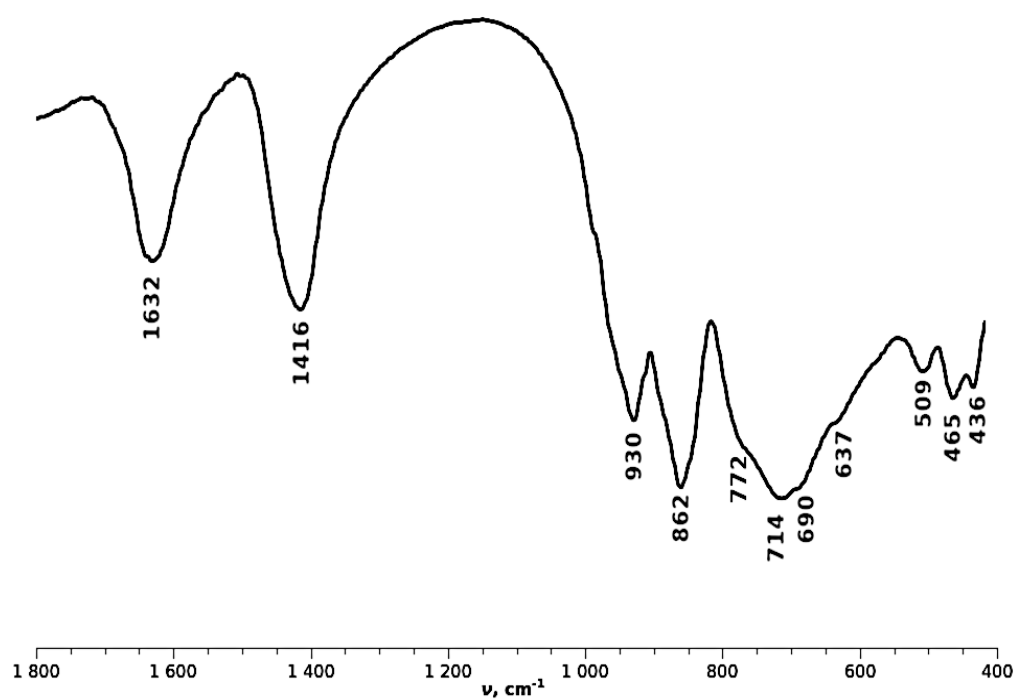

**Figure S11.** IR spectrum of complex 2.

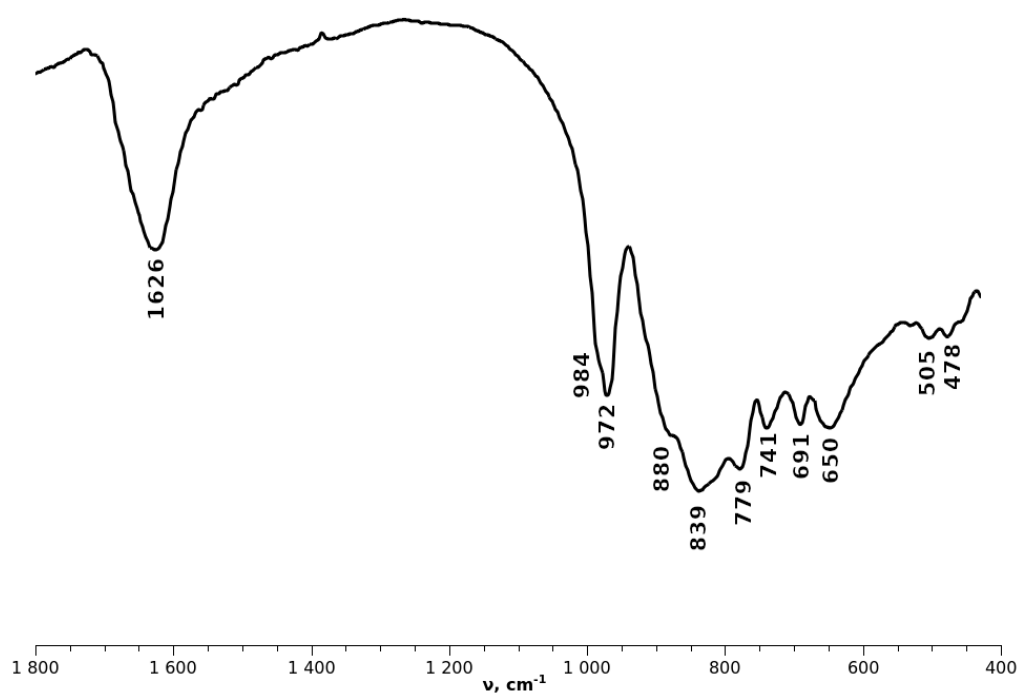

**Figure S12.** IR spectrum of complex 3.
